# Supplementary material for: Mechanical reinforcement of PBO fibers by dicarboxylic acid functionalized carbon nanotubes through in situ copolymerization
Source: Royal Society of Chemistry journal article supplement (doi:10.1039/c6ra16541a), 2016-01-01
Supplement: c6ra16541a1.pdf [file c6ra16541a1.pdf]

Electronic Supplementary Material (ESI) for RSC Advances.  
This journal is © The Royal Society of Chemistry 2016

---

**Mechanical reinforcement of PBO fibers by dicarboxylic acid  
functionalized carbon nanotubes through *in situ* copolymerization**

Yanwei Li,<sup>\*a</sup> Qian Duan,<sup>a</sup> Yanhui Li,<sup>a</sup> Zhen Hu,<sup>b</sup> Jun Li,<sup>b</sup> Yuanjun Song,<sup>b</sup> and Yudong Huang<sup>\*b</sup>

<sup>a</sup>School of Materials Science and Engineering, Changchun University of Science and Technology, 130022, Changchun, China. E-mail: liyanwei@cust.edu.cn

<sup>b</sup>School of Chemical Engineering and Technology, Harbin Institute of Technology, 150001, Harbin, China. E-mail: ydhuang.hit1@aliyun.com

**Table S1** Research on the viscosity of PBO and CNTs I-III & PBO copolymer fibers.

| Sample fibers  | $[\eta]$ (dL·g <sup>-1</sup> ) | $M_v$ (g·mol <sup>-1</sup> ) |
|----------------|--------------------------------|------------------------------|
| PBO            | 8.9                            | 1.48 × 10 <sup>4</sup>       |
| CNTs I & PBO   | 12.0                           | 1.66 × 10 <sup>4</sup>       |
| CNTs II & PBO  | 12.5                           | 1.69 × 10 <sup>4</sup>       |
| CNTs III & PBO | 13.8                           | 1.79 × 10 <sup>4</sup>       |

$$E_p = E_m \left[ \frac{1+2(l_{NT}/d_{NT})\eta_P V_{NT}}{1-\eta_P V_{NT}} \right] \quad (1)$$

$$E_c = E_m \left[ \frac{3+2(l_{NT}/d_{NT})\eta_L V_{NT}}{8(1-\eta_L V_{NT})} + \frac{5+2\eta_U V_{NT}}{8(1-2\eta_U V_{NT})} \right] \quad (2)$$

where in (1)  $\eta_P = \frac{(E_{NT}/E_m) - 1}{(E_{NT}/E_m) + 2(l_{NT}/d_{NT})}$  ,

in (2)  $\eta_L = \frac{(E_{NT}/E_m) - 1}{(E_{NT}/E_m) + 2(l_{NT}/d_{NT})}$  and  $\eta_U = \frac{(E_{NT}/E_m) - 1}{(E_{NT}/E_m) + 2}$  .

In the above equations,  $E_p$  is the tensile modulus of the composites with CNTs aligned along axial direction of the fiber,  $E_c$  is the tensile modulus of the composite fiber with randomly distributed CNTs,  $E_m$  is the tensile modulus of PBO matrix,  $E_{NT}$  is tensile modulus (1 TPa) of CNTs bundle,  $l_{NT}$  and  $d_{NT}$  are average length (50 nm) and diameter (5 nm) of CNTs bundles,  $V_{NT}$  is the volume fraction of CNTs. The density for CNTs, PBO for calculation  $V_{NT}$  is 1.60, 1.54 g·cm<sup>-3</sup>, respectively.

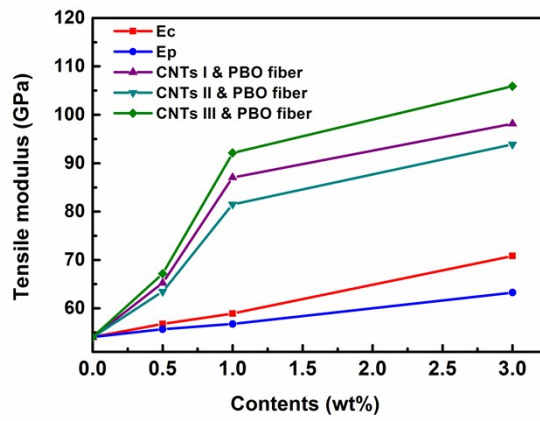

**Fig.S1** Tensile modulus of CNTs I-III & PBO copolymer fibers compared with the prediction values
